# Supplementary material for: Intervention effects of five cations and their correction on hemolytic activity of tentacle extract from the jellyfish Cyanea capillata
Source: PeerJ. 2017 May 9;5:e3338. doi: 10.7717/peerj.3338 (PMC5426461; doi:10.7717/peerj.3338)
Supplement: Supplemental Information 1 — The dose-response curve is depicted based on Hill’s co-operation analysis. All data are presented as the mean ± SD (n = 3). [file peerj-05-3338-s001.xlsx]

## Sheet: n=1
Raw Data{Wavelength:415.0}
	1	2	3	4	5	6	7	8	9	10	11	12
A	0.051	0.048	0.049	0.049	0.046	0.052	0.05	0.05	0.05	0.05	0.048	0.05
B	0.043	0.222	0.243	0.231	0.819	1.311	1.281	1.408	1.275	0.045	0.042	0.043
C	0.043	0.199	0.225	0.233	0.745	1.341	1.269	1.295	1.493	0.044	0.043	0.043
D	0.044	0.236	0.25	0.248	0.761	1.195	1.353	1.533	1.536	0.172	1.581	0.045
E	0.042	0.207	0.293	0.236	0.805	1.272	1.404	1.469	1.435	0.188	1.514	0.043
F	0.042	0.272	0.301	0.29	1.024	1.188	1.415	1.495	1.511	0.045	0.043	0.044
G	0.043	0.217	0.304	0.267	0.912	1.265	1.345	1.413	1.546	0.044	0.043	0.043
H	0.044	0.045	0.045	0.044	0.045	0.045	0.045	0.047	0.045	0.047	0.045	0.045
		BS	皂素（50ug/ml）	TE(ug/ml)
				0	30	90	180	270	360	450	540
		0.172	1.581	0.222	0.243	0.231	0.819	1.311	1.281	1.408	1.275
		0.188	1.514	0.199	0.225	0.233	0.745	1.341	1.269	1.295	1.493
	average	0.18	1.5475	0.2105	0.234	0.232	0.782	1.326	1.275	1.3515	1.384
	溶血率	0	100	2.23035	3.94881	3.80256	44.0219	83.8026	80.0731	85.6673	88.0439
				Dextran(5ug/ml)+TE(ug/ml)
				0	30	90	180	270	360	450	540
				0.236	0.25	0.248	0.761	1.195	1.353	1.533	1.536
				0.207	0.293	0.236	0.805	1.272	1.404	1.469	1.435
				0.2215	0.2715	0.242	0.783	1.2335	1.3785	1.501	1.4855
				3.03473	6.69104	4.53382	44.0951	77.0384	87.6417	96.5996	95.4662
				Dextran(1ug/ml)+TE(ug/ml)
				0	30	90	180	270	360	450	540
				0.272	0.301	0.29	1.024	1.188	1.415	1.495	1.511
				0.217	0.304	0.267	0.912	1.265	1.345	1.413	1.546
				0.2445	0.3025	0.2785	0.968	1.2265	1.38	1.454	1.5285
				4.71664	8.95795	7.20293	57.6234	76.5265	87.7514	93.1627	98.6106

## Sheet: n=2
Raw Data{Wavelength:415.0}
	1	2	3	4	5	6	7	8	9	10	11	12
A	0.05	0.049	0.048	0.05	0.046	0.053	0.05	0.048	0.051	0.048	0.049	0.049
B	0.043	0.251	0.329	0.4	1.074	1.452	1.575	1.654	1.582	0.044	0.045	0.043
C	0.043	0.286	0.314	0.419	0.742	1.504	1.552	1.593	1.542	0.043	0.044	0.043
D	0.044	0.249	0.307	0.361	0.939	1.568	1.581	1.681	1.692	0.246	1.755	0.045
E	0.042	0.309	0.29	0.383	1.171	1.235	1.378	1.492	1.452	0.248	1.741	0.043
F	0.042	0.277	0.333	0.351	1.146	1.368	1.466	1.697	1.699	0.044	0.044	0.043
G	0.043	0.301	0.309	0.359	1.155	1.368	1.432	1.713	1.661	0.043	0.044	0.044
H	0.043	0.045	0.044	0.045	0.044	0.044	0.044	0.044	0.047	0.044	0.048	0.045
			BS	皂素（50ug/ml）	TE(ug/ml)
					0	30	90	180	270	360	450	540
			0.246	1.755	0.251	0.329	0.4	1.074	1.452	1.575	1.654	1.582
			0.248	1.741	0.286	0.314	0.419	0.742	1.504	1.552	1.593	1.542
		average	0.247	1.748	0.2685	0.3215	0.4095	0.908	1.478	1.5635	1.6235	1.562
		溶血率	0	100	1.43238	4.96336	10.8261	44.0373	82.012	87.7082	91.7055	87.6083
					Dextran(5ug/ml)+TE(ug/ml)
					0	30	90	180	270	360	450	540
					0.249	0.307	0.361	0.939	1.568	1.581	1.681	1.692
					0.309	0.29	0.383	1.171	1.235	1.378	1.492	1.452
					0.279	0.2985	0.372	1.055	1.4015	1.4795	1.5865	1.572
					2.13191	3.43105	8.32778	53.8308	76.9154	82.1119	89.2405	88.2745
					Dextran(1ug/ml)+TE(ug/ml)
					0	30	90	180	270	360	450	540
					0.277	0.333	0.351	1.146	1.368	1.466	1.697	1.699
					0.301	0.309	0.359	1.155	1.368	1.432	1.713	1.661
					0.289	0.321	0.355	1.1505	1.368	1.449	1.705	1.68
					2.79813	4.93005	7.1952	60.1932	74.6835	80.0799	97.1352	95.4697

## Sheet: n=3
Raw Data{Wavelength:415.0}
	1	2	3	4	5	6	7	8	9	10	11	12
A	0.049	0.051	0.05	0.051	0.049	0.055	0.052	0.051	0.053	0.051	0.051	0.051
B	0.043	0.143	0.181	0.186	0.884	1.531	1.412	1.637	1.556	0.044	0.044	0.043
C	0.043	0.143	0.187	0.238	1.307	1.442	1.403	1.637	1.51	0.044	0.045	0.043
D	0.045	0.132	0.181	0.163	1.308	0.863	1.406	1.712	1.655	2.114	0.047	0.045
E	0.042	0.17	0.185	0.208	1.209	0.81	1.445	1.827	1.544	0.167	1.94	0.042
F	0.043	0.248	0.247	0.207	1.048	0.812	1.506	1.563	1.687	0.044	0.045	0.043
G	0.047	0.245	0.181	0.22	1.411	0.762	1.439	1.764	1.623	0.044	0.045	0.044
H	0.044	0.046	0.046	0.047	0.046	0.047	0.046	0.045	0.047	0.046	0.046	0.045
				BS	皂素（50ug/ml）	TE(ug/ml)
						0	30	90	180	270	360	450	540
				0.167	1.94	0.143	0.181	0.186	0.884	1.531	1.412	1.637	1.556
						0.143	0.187	0.238	1.307	1.442	1.403	1.637	1.51
			average	0.167	1.94	0.143	0.184	0.212	1.0955	1.4865	1.4075	1.637	1.533
			溶血率	0	100	0	0.958827	2.53807	52.3689	74.4219	69.9662	82.9103	77.0446
						Dextran(5ug/ml)+TE(ug/ml)
						0	30	90	180	270	360	450	540
						0.132	0.181	0.163	0.863	1.308	1.406	1.712	1.655
						0.17	0.185	0.208	0.81	1.209	1.445	1.827	1.544
						0.151	0.183	0.1855	0.8365	1.2585	1.4255	1.7695	1.5995
						0	0.902425	1.04343	37.7609	61.5623	70.9814	90.3835	80.7953
						Dextran(1ug/ml)+TE(ug/ml)
						0	30	90	180	270	360	450	540
						0.248	0.247	0.207	0.812	1.048	1.506	1.563	1.687
						0.245	0.181	0.22	0.762	1.411	1.439	1.764	1.623
						0.2465	0.214	0.2135	0.787	1.2295	1.4725	1.6635	1.655
						4.48393	2.65087	2.62267	34.969	59.9267	73.6323	84.405	83.9255

## Sheet: 固定Dextran溶血汇总
												TE组	TE(ug/ml)
														n=1	n=2	n=3	average	SD
		0	30	90	180	270	360	450	540				0	2.23035	1.43238	0	1.22091	1.13011
TE	n=1	2.23035	3.94881	3.80256	44.0219	83.8026	80.0731	85.6673	88.0439				30	3.94881	4.96336	0.958827	3.29033	2.08189
	n=2	1.43238	4.96336	10.8261	44.0373	82.012	87.7082	91.7055	87.6083				90	3.80256	10.8261	2.53807	5.72225	4.46507
	n=3	0	0.958827	2.53807	52.3689	74.4219	69.9662	82.9103	77.0446				180	44.0219	44.0373	52.3689	46.8094	4.81467
	average	1.22091	3.29033	5.72225	46.8094	80.0788	79.2492	86.761	84.2322				270	83.8026	82.012	74.4219	80.0788	4.98018
	SD	1.13011	2.08189	4.46507	4.81467	4.98018	8.89967	4.49846	6.22852				360	80.0731	87.7082	69.9662	79.2492	8.89967
													450	85.6673	91.7055	82.9103	86.761	4.49846
													540	88.0439	87.6083	77.0446	84.2322	6.22852
