# Supplementary material for: Intervention effects of five cations and their correction on hemolytic activity of tentacle extract from the jellyfish Cyanea capillata
Source: PeerJ. 2017 May 9;5:e3338. doi: 10.7717/peerj.3338 (PMC5426461; doi:10.7717/peerj.3338)
Supplement: Supplemental Information 4 [file peerj-05-3338-s004.xls]

## Sheet: Raw Data{Wavelength-415.0}
Raw Data{Wavelength:415.0}
	1	2	3	4	5	6	7	8	9	10	11	12
A	0.043	0.043	0.044	0.044	0.042	0.049	0.046	0.046	0.051	0.047	0.044	0.045
B	0.042	0.153	0.085	0.068	0.121	0.185	1.246	1.251	1.036	0.799	0.334	0.042
C	0.042	0.17	0.091	0.093	0.151	0.097	1.313	1.261	1.033	0.79	0.237	0.043
D	0.05	0.252	1.7	0.136	0.133	0.345	0.322	1.402	1.277	0.986	0.715	0.051
E	0.042	1.657	0.042	0.043	0.043	0.043	0.043	0.043	0.043	0.043	0.043	0.042
F	0.042	1.682	0.043	0.043	0.043	0.043	0.043	0.043	0.043	0.043	0.043	0.042
G	0.045	0.387	0.045	0.045	0.044	0.044	0.044	0.044	0.044	0.045	0.044	0.043
H	0.044	0.044	0.044	0.045	0.044	0.044	0.044	0.043	0.044	0.044	0.044	0.044
			control	皂素	Zn2+				TE(360)+Zn2+
					10	20	40	100	0	10	20	40	100
			0.153	1.657	0.085	0.068	0.121	0.185	1.246	1.251	1.036	0.799	0.334
		average	0.153	1.657	0.085	0.068	0.121	0.185	1.246	1.251	1.036	0.799	0.334
		OD-control	0	1.504	-0.068	-0.085	-0.032	0.032	1.093	1.098	0.883	0.646	0.181
		第三组减去内参								1.166	0.968	0.678	0.149
			0	1.504	-0.068	-0.085	-0.032	0.032	1.093	1.166	0.968	0.678	0.149
		溶血率	0	100	-4.52128	-5.6516	-2.12766	2.12766	72.6729	77.5266	64.3617	45.0798	9.90691

## Sheet: 2-1
Raw Data{Wavelength:415.0}
	1	2	3	4	5	6	7	8	9	10	11	12
A	0.043	0.043	0.044	0.044	0.042	0.049	0.046	0.046	0.051	0.047	0.044	0.045
B	0.042	0.153	0.085	0.068	0.121	0.185	1.246	1.251	1.036	0.799	0.334	0.042
C	0.042	0.17	0.091	0.093	0.151	0.097	1.313	1.261	1.033	0.79	0.237	0.043
D	0.05	0.252	1.7	0.136	0.133	0.345	0.322	1.402	1.277	0.986	0.715	0.051
E	0.042	1.657	0.042	0.043	0.043	0.043	0.043	0.043	0.043	0.043	0.043	0.042
F	0.042	1.682	0.043	0.043	0.043	0.043	0.043	0.043	0.043	0.043	0.043	0.042
G	0.045	0.387	0.045	0.045	0.044	0.044	0.044	0.044	0.044	0.045	0.044	0.043
H	0.044	0.044	0.044	0.045	0.044	0.044	0.044	0.043	0.044	0.044	0.044	0.044
			control	皂素	Zn2+				TE(360)+Zn2+
					10	20	40	100	0	10	20	40	100
		average	0.17	1.682	0.091	0.093	0.151	0.097	1.313	1.261	1.033	0.79	0.237
		OD-control	0	1.512	-0.079	-0.077	-0.019	-0.073	1.143	1.091	0.863	0.62	0.067
		第三组减去内参								1.17	0.94	0.639	0.14
			0	1.512	-0.079	-0.077	-0.019	-0.073	1.143	1.17	0.94	0.639	0.14
		溶血率	0	100	-5.22487	-5.09259	-1.25661	-4.82804	75.5952	77.381	62.1693	42.2619	9.25926

## Sheet: 3-1
Raw Data{Wavelength:415.0}
	1	2	3	4	5	6	7	8	9	10	11	12
A	0.043	0.043	0.044	0.044	0.042	0.049	0.046	0.046	0.051	0.047	0.044	0.045
B	0.042	0.153	0.085	0.068	0.121	0.185	1.246	1.251	1.036	0.799	0.334	0.042
C	0.042	0.17	0.091	0.093	0.151	0.097	1.313	1.261	1.033	0.79	0.237	0.043
D	0.05	0.252	1.7	0.136	0.133	0.345	0.322	1.402	1.277	0.986	0.715	0.051
E	0.042	1.657	0.042	0.043	0.043	0.043	0.043	0.043	0.043	0.043	0.043	0.042
F	0.042	1.682	0.043	0.043	0.043	0.043	0.043	0.043	0.043	0.043	0.043	0.042
G	0.045	0.387	0.045	0.045	0.044	0.044	0.044	0.044	0.044	0.045	0.044	0.043
H	0.044	0.044	0.044	0.045	0.044	0.044	0.044	0.043	0.044	0.044	0.044	0.044
				control	皂素	Zn2+				TE(360)+Zn2+
						10	20	40	100	0	10	20	40	100
			average	0.252	1.7	0.136	0.133	0.345	0.322	1.402	1.277	0.986	0.715	0.387
			OD-control	0	1.448	-0.116	-0.119	0.093	0.07	1.15	1.025	0.734	0.463	0.135
			第三组减去内参								1.141	0.853	0.37	0.065
				0	1.448	-0.116	-0.119	0.093	0.07	1.15	1.141	0.853	0.37	0.065
			溶血率	0	100	-8.01105	-8.21823	6.42265	4.83425	79.4199	78.7983	58.9088	25.5525	4.48895

## Sheet: 工作表1
		control	皂素	Zn2+				TE(360)+Zn2+
				10	20	40	100	0	10	20	40	100
	N=1	0	100	-4.52128	-5.6516	-2.12766	2.12766	81.27	77.5266	64.3617	45.0798	9.90691
	N=2	0	100	-5.22487	-5.09259	-1.25661	-4.82804	91.2245	77.381	62.1693	42.2619	9.25926
	N=3	0	100	-8.01105	-8.21823	6.42265	4.83425	79.4199	78.7983	58.9088	25.5525	4.48895
	average	0	100	-5.91906	-6.32081	1.01279	0.71129	83.9715	77.902	61.8133	37.6314	7.88504
	SD	0	0	1.84555	1.66682	4.70527	4.98443	6.34905	0.779695	2.74381	10.5551	2.95887
		X轴
		Zn2+
		mM		SD
		0	83.9715	6.34905
		10	77.902	0.779695
		20	61.8133	2.74381
		40	37.6314	10.5551
		100	7.88504	2.95887
