# Supplementary material for: Intervention effects of five cations and their correction on hemolytic activity of tentacle extract from the jellyfish Cyanea capillata
Source: PeerJ. 2017 May 9;5:e3338. doi: 10.7717/peerj.3338 (PMC5426461; doi:10.7717/peerj.3338)
Supplement: Supplemental Information 5 [file peerj-05-3338-s005.xls]

## Sheet: Raw Data{Wavelength-415.0}
Raw Data{Wavelength:415.0}
	1	2	3	4	5	6	7	8	9	10	11	12
A	0.042	0.046	0.044	0.045	0.043	0.049	0.046	0.045	0.047	0.045	0.044	0.043
B	0.043	0.153	1.077	0.288	0.349	0.289	0.348	1.162	0.405	0.746	0.244	0.042
C	0.043	0.197	1.223	1.289	1.375	0.333	0.304	0.307	0.321	1.219	0.949	0.042
D	0.051	0.577	0.318	0.245	0.163	1.808	0.171	0.198	0.243	0.268	1.709	0.051
E	0.042	0.147	0.192	0.186	0.228	1.712	1.492	1.384	0.563	0.256	1.776	0.042
F	0.043	0.957	0.352	0.247	0.259	1.752	1.614	1.172	0.568	0.337	0.267	0.043
G	0.044	1.773	0.939	0.374	0.226	0.176	1.709	1.644	1.186	0.637	0.339	0.043
H	0.045	0.047	0.044	0.045	0.044	0.044	0.044	0.044	0.044	0.044	0.045	0.044
			control	皂素	Cu2+(um)				TE(360)+Cu2+(um)
					30	60	90	120	0	30	60	90	120
		average	0.256	1.776	0.957	0.352	0.247	0.259	1.752	1.614	1.172	0.568	0.337
		OD-control	0	1.52	0.701	0.096	-0.009	0.003	1.496	1.358	0.916	0.312	0.081
		TE组减去内参
			0	1.52	0.701	0.096	-0.009	0.003	1.496	1.358	0.916	0.312	0.081
		溶血率	0	100	46.1184	6.31579	-0.592105	0.197368	98.4211	89.3421	60.2632	20.5263	5.32895
			control	皂素	Cu2+(um)				TE(360)+Cu2+(um)
					30	60	90	120	0	30	60	90	120
		average	0.267	1.773	0.939	0.374	0.226	0.176	1.709	1.644	1.186	0.637	0.339
		OD-control	0	1.506	0.672	0.107	-0.041	-0.091	1.442	1.377	0.919	0.37	0.072
		TE组减去内参
			0	1.506	0.672	0.107	-0.041	-0.091	1.442	1.377	0.919	0.37	0.072
		溶血率	0	100	44.6215	7.10491	-2.72244	-6.0425	95.7503	91.4343	61.0226	24.5684	4.78088
				control	皂素	Cu2+(um)				TE(360)+Cu2+(um)
						30	60	90	120	0	30	60	90	120
			n=1	0	100	46.1184	6.31579	-0.592105	0.197368	98.4211	89.3421	60.2632	20.5263	5.32895
			n=2	0	100	44.6215	7.10491	-2.72244	-6.0425	95.7503	91.4343	61.0226	24.5684	4.78088
			average	0	100	45.37	6.71035	-1.65727	-2.92256	97.0857	90.3882	60.6429	22.5474	5.05491
			SD	0	0	1.05847	0.557995	1.50638	4.41225	1.88848	1.47938	0.53699	2.85818	0.387545
				TE+Cu2+	average	SD
				0	97.0857	1.88848
				30	90.3882	1.47938
				60	60.6429	0.53699
				90	22.5474	2.85818
				120	5.05491	0.387545
