# Supplementary material for: Intervention effects of five cations and their correction on hemolytic activity of tentacle extract from the jellyfish Cyanea capillata
Source: PeerJ. 2017 May 9;5:e3338. doi: 10.7717/peerj.3338 (PMC5426461; doi:10.7717/peerj.3338)
Supplement: Supplemental Information 7 [file peerj-05-3338-s007.xlsx]

## Sheet: 溶液本身-1
Raw Data{Wavelength:415.0}
	1	2	3	4	5	6	7	8	9	10	11	12
A	0.046	0.047	0.049	0.048	0.046	0.045	0.046	0.047	0.048	0.045	0.043	0.043
B	0.042	0.039	0.352	0.374	0.246	0.426	0.244	0.336	0.167	0.208	0.326	0.042
C	0.043	0.317	0.258	0.61	0.227	0.043	0.043	0.044	0.043	0.043	0.042	0.043
D	0.051	0.052	0.052	0.052	0.052	0.052	0.053	0.053	0.051	0.051	0.05	0.051
E	0.041	0.034	0.041	0.041	0.327	0.039	0.353	0.045	0.043	0.043	0.042	0.043
F	0.042	0.046	0.048	0.049	0.34	0.045	0.358	0.045	0.044	0.044	0.042	0.043
G	0.043	0.043	0.044	0.044	0.044	0.043	0.044	0.045	0.044	0.044	0.043	0.043
H	0.043	0.044	0.044	0.044	0.044	0.044	0.044	0.045	0.044	0.044	0.043	0.044

## Sheet: 溶液本身-2
Raw Data{Wavelength:415.0}
	1	2	3	4	5	6	7	8	9	10	11	12
A	0.047	0.047	0.05	0.047	0.045	0.045	0.046	0.046	0.048	0.045	0.044	0.043
B	0.043	0.038	0.351	0.371	0.245	0.425	0.244	0.335	0.168	0.205	0.327	0.041
C	0.043	0.317	0.258	0.613	0.229	0.043	0.044	0.043	0.042	0.042	0.042	0.042
D	0.051	0.051	0.051	0.05	0.051	0.051	0.053	0.051	0.05	0.05	0.049	0.05
E	0.042	0.034	0.04	0.041	0.355	0.038	0.353	0.043	0.042	0.042	0.042	0.042
F	0.043	0.046	0.048	0.049	0.38	0.044	0.358	0.044	0.043	0.043	0.043	0.043
G	0.043	0.043	0.043	0.043	0.043	0.042	0.044	0.043	0.043	0.043	0.043	0.042
H	0.043	0.043	0.043	0.043	0.043	0.042	0.044	0.043	0.043	0.042	0.043	0.043

## Sheet: 溶液本身-3
Raw Data{Wavelength:415.0}
	1	2	3	4	5	6	7	8	9	10	11	12
A	0.046	0.046	0.048	0.047	0.046	0.046	0.045	0.046	0.048	0.045	0.044	0.044
B	0.042	0.038	0.35	0.366	0.246	0.422	0.243	0.332	0.168	0.202	0.323	0.042
C	0.043	0.317	0.255	0.618	0.23	0.043	0.043	0.042	0.043	0.043	0.042	0.043
D	0.05	0.05	0.049	0.05	0.05	0.051	0.051	0.051	0.051	0.05	0.049	0.05
E	0.04	0.04	0.038	0.039	0.356	0.037	0.355	0.042	0.043	0.042	0.041	0.042
F	0.042	0.047	0.048	0.049	0.383	0.044	0.357	0.044	0.044	0.043	0.042	0.043
G	0.043	0.042	0.042	0.043	0.042	0.043	0.043	0.043	0.044	0.043	0.042	0.042
H	0.043	0.043	0.042	0.043	0.042	0.043	0.043	0.043	0.044	0.043	0.042	0.043

## Sheet: 离子与体系0min-1
Raw Data{Wavelength:415.0}
	1	2	3	4	5	6	7	8	9	10	11	12
A	0.044	0.046	0.046	0.046	0.045	0.045	0.045	0.045	0.047	0.045	0.046	0.044
B	0.042	1.762	1.749	1.967	1.423	1.552	1.568	0.044	0.045	0.044	0.044	0.043
C	0.042	1.785	1.779	1.97	1.364	1.394	1.483	0.044	0.044	0.044	0.044	0.043
D	0.05	0.051	0.053	0.052	0.053	0.053	0.053	0.052	0.052	0.051	0.051	0.051
E	0.041	0.042	0.043	0.043	0.043	0.044	0.043	0.042	0.043	0.042	0.045	0.043
F	0.042	0.042	0.043	0.043	0.043	0.044	0.043	0.043	0.044	0.043	0.047	0.044
G	0.042	0.043	0.044	0.044	0.044	0.044	0.043	0.043	0.045	0.044	0.044	0.043
H	0.043	0.044	0.044	0.044	0.044	0.044	0.043	0.043	0.045	0.044	0.044	0.044

## Sheet: 离子与体系0min-2
Raw Data{Wavelength:415.0}
	1	2	3	4	5	6	7	8	9	10	11	12
A	0.045	0.047	0.047	0.046	0.046	0.045	0.046	0.046	0.047	0.045	0.045	0.045
B	0.043	1.697	1.62	1.955	1.233	1.434	1.416	0.044	0.045	0.043	0.043	0.043
C	0.044	1.802	1.632	1.888	1.142	1.293	1.316	0.044	0.044	0.044	0.043	0.044
D	0.05	0.052	0.052	0.052	0.052	0.052	0.052	0.052	0.051	0.051	0.05	0.051
E	0.042	0.042	0.044	0.044	0.044	0.044	0.044	0.043	0.044	0.042	0.042	0.043
F	0.043	0.043	0.044	0.044	0.043	0.043	0.044	0.044	0.045	0.043	0.046	0.044
G	0.044	0.044	0.044	0.044	0.044	0.043	0.044	0.044	0.045	0.043	0.043	0.044
H	0.044	0.045	0.044	0.045	0.044	0.044	0.045	0.044	0.046	0.044	0.043	0.044

## Sheet: 离子与体系0min-3
Raw Data{Wavelength:415.0}
	1	2	3	4	5	6	7	8	9	10	11	12
A	0.045	0.046	0.045	0.044	0.045	0.044	0.045	0.045	0.045	0.046	0.044	0.043
B	0.042	1.693	1.567	1.974	1.191	1.408	1.35	0.043	0.043	0.043	0.043	0.041
C	0.042	1.772	1.587	1.909	1.115	1.303	1.222	0.043	0.043	0.043	0.042	0.042
D	0.049	0.051	0.051	0.05	0.051	0.051	0.051	0.051	0.049	0.05	0.048	0.049
E	0.04	0.042	0.043	0.042	0.043	0.043	0.042	0.041	0.042	0.042	0.041	0.041
F	0.041	0.042	0.042	0.042	0.042	0.042	0.042	0.042	0.043	0.043	0.045	0.041
G	0.042	0.042	0.043	0.042	0.043	0.042	0.042	0.042	0.043	0.043	0.042	0.041
H	0.041	0.043	0.043	0.042	0.042	0.042	0.042	0.042	0.043	0.043	0.042	0.042

## Sheet: 整合
		control	La3+	Mn2+	Zn2+	Cu2+	Fe2+
溶液本身	n=1	0.034	0.041	0.041	0.327	0.039	0.353
		0.046	0.048	0.049	0.34	0.045	0.358
	n=2	0.034	0.04	0.041	0.355	0.038	0.353
		0.046	0.048	0.049	0.38	0.044	0.358
	n=3	0.04	0.038	0.039	0.356	0.037	0.355
		0.047	0.048	0.049	0.383	0.044	0.357
	average	0.0411667	0.0438333	0.0446667	0.356833	0.0411667	0.355667
	SD	0.00608002	0.00466548	0.00480278	0.0219036	0.00354495	0.00233809
	T-test		0.413984	0.294422	1.14093e-11	1	4.58407e-17
		control	La3+	Mn2+	Zn2+	Cu2+	Fe2+
离子与反应体系	n=1	1.762	1.749	1.967	1.423	1.552	1.568
		1.785	1.779	1.97	1.364	1.394	1.483
	n=2	1.697	1.62	1.955	1.233	1.434	1.416
		1.802	1.632	1.888	1.142	1.293	1.316
	n=3	1.693	1.567	1.974	1.191	1.408	1.35
		1.772	1.587	1.909	1.115	1.303	1.222
	average	1.75183	1.65567	1.94383	1.24467	1.39733	1.3925
	SD	0.0460322	0.0875572	0.0362955	0.123623	0.095053	0.123508
	%	100	94.5105	110.96	71.0494	79.7641	79.4882
	T-test		0.0385266	1.14842e-05	2.7478e-06	9.25773e-06	5.5149e-05
