# Supplementary material for: Intervention effects of five cations and their correction on hemolytic activity of tentacle extract from the jellyfish Cyanea capillata
Source: PeerJ. 2017 May 9;5:e3338. doi: 10.7717/peerj.3338 (PMC5426461; doi:10.7717/peerj.3338)
Supplement: Supplemental Information 9 [file peerj-05-3338-s009.xlsx]

## Sheet: 1-1
Raw Data{Wavelength:415.0}
	1	2	3	4	5	6	7	8	9	10	11	12
A	0.046	0.045	0.046	0.046	0.043	0.053	0.049	0.048	0.052	0.051	0.05	0.048
B	0.043	2.127	2.092	2.122	2.153	2.103	2.227	2.209	2.246	2.236	2.232	0.045
C	0.043	2.111	1.936	2.197	2.178	2.113	2.128	1.624	1.582	1.189	0.141	0.045
D	0.049	2.237	1.781	1.677	0.051	0.41	2.417	2.249	2.191	2.092	1.801	0.053
E	0.042	2.288	2.184	2.161	1.99	1.73	2.301	2.195	2.021	2.021	1.78	0.044
F	0.044	0.043	0.044	0.044	0.043	0.045	0.045	0.044	0.044	0.044	0.044	0.045
G	0.045	0.044	0.044	0.045	0.044	0.045	0.045	0.044	0.046	0.049	0.045	0.045
H	0.044	0.045	0.045	0.045	0.044	0.045	0.045	0.045	0.045	0.046	0.045	0.046

## Sheet: 2-1
Raw Data{Wavelength:415.0}
	1	2	3	4	5	6	7	8	9	10	11	12
A	0.046	0.046	0.047	0.046	0.045	0.052	0.049	0.049	0.052	0.051	0.05	0.047
B	0.043	2.112	2.088	2.114	2.145	2.083	2.214	2.186	2.229	2.219	2.222	0.043
C	0.042	2.114	1.945	2.2	2.195	2.115	2.128	1.617	1.574	1.186	0.141	0.043
D	0.05	2.203	1.775	1.672	0.051	0.406	2.356	2.221	2.167	2.082	1.787	0.051
E	0.042	2.305	2.199	2.162	1.995	1.724	2.281	2.161	2.016	2.022	1.779	0.042
F	0.043	0.043	0.043	0.043	0.043	0.043	0.043	0.043	0.044	0.043	0.043	0.044
G	0.044	0.043	0.043	0.044	0.044	0.043	0.044	0.044	0.046	0.048	0.044	0.044
H	0.044	0.044	0.044	0.044	0.044	0.044	0.044	0.044	0.045	0.045	0.044	0.045

## Sheet: 3-1
Raw Data{Wavelength:415.0}
	1	2	3	4	5	6	7	8	9	10	11	12
A	0.045	0.044	0.046	0.047	0.045	0.053	0.048	0.049	0.052	0.051	0.05	0.047
B	0.043	2.108	2.09	2.106	2.138	2.086	2.198	2.192	2.208	2.202	2.208	0.043
C	0.043	2.099	1.939	2.188	2.193	2.113	2.126	1.626	1.574	1.187	0.142	0.044
D	0.05	2.208	1.769	1.674	0.052	0.413	2.381	2.222	2.173	2.08	1.794	0.05
E	0.042	2.309	2.193	2.15	1.991	1.722	2.279	2.166	2.009	2.017	1.774	0.042
F	0.043	0.043	0.044	0.045	0.045	0.045	0.044	0.045	0.045	0.044	0.044	0.044
G	0.045	0.044	0.045	0.045	0.045	0.045	0.043	0.045	0.046	0.049	0.044	0.044
H	0.044	0.045	0.046	0.046	0.045	0.045	0.044	0.045	0.046	0.047	0.045	0.045

## Sheet: Sheet1
		0mM	50	100	200	400			average	SD
		2.417	2.249	2.191	2.092	1.801		0	2.33367	0.0733303
		2.305	2.199	2.162	1.995	1.724		50	2.20467	0.0417892
		2.279	2.166	2.009	2.017	1.774		100	2.12067	0.0977872
	average	2.33367	2.20467	2.12067	2.03467	1.76633		200	2.03467	0.050856
	SD	0.0733303	0.0417892	0.0977872	0.050856	0.0390683		400	1.76633	0.0390683
