# Supplementary material for: Intervention effects of five cations and their correction on hemolytic activity of tentacle extract from the jellyfish Cyanea capillata
Source: PeerJ. 2017 May 9;5:e3338. doi: 10.7717/peerj.3338 (PMC5426461; doi:10.7717/peerj.3338)
Supplement: Supplemental Information 10 [file peerj-05-3338-s010.xlsx]

## Sheet: 1-1
Raw Data{Wavelength:415.0}
	1	2	3	4	5	6	7	8	9	10	11	12
A	0.046	0.047	0.048	0.047	0.043	0.051	0.048	0.048	0.05	0.047	0.047	0.05
B	0.043	1.907	1.698	1.662	1.611	1.615	1.38	0.605	0.559	0.614	0.712	0.043
C	0.044	2.134	1.138	0.923	0.829	0.816	2.133	1.887	1.845	1.698	1.636	0.044
D	0.051	2.183	1.82	1.308	0.822	0.522	2.279	1.26	0.894	0.822	0.789	0.05
E	0.048	2.126	1.218	0.834	0.795	0.714	2.154	2.144	2.119	1.971	1.839	0.045
F	0.043	2.211	2.136	2.13	2.013	1.898	2.212	1.873	1.28	0.854	0.551	0.046
G	0.044	2.228	1.876	1.339	0.767	0.551	2.298	1.122	0.541	0.339	0.182	0.044
H	0.044	0.043	0.044	0.045	0.044	0.044	0.044	0.046	0.045	0.044	0.044	0.045

## Sheet: 2-1
Raw Data{Wavelength:415.0}
	1	2	3	4	5	6	7	8	9	10	11	12
A	0.046	0.045	0.046	0.046	0.044	0.054	0.046	0.047	0.05	0.051	0.049	0.047
B	0.043	2.119	2.099	2.128	2.155	2.118	2.209	2.204	2.226	2.233	2.237	0.044
C	0.042	2.109	1.943	2.186	2.191	2.132	2.288	1.624	1.704	1.283	0.158	0.043
D	0.048	2.343	1.891	1.808	0.051	0.464	0.05	0.049	0.049	0.049	0.048	0.05
E	0.042	0.042	0.042	0.041	0.042	0.043	0.042	0.042	0.044	0.043	0.043	0.042
F	0.043	0.042	0.043	0.043	0.043	0.044	0.043	0.043	0.044	0.044	0.043	0.043
G	0.044	0.043	0.044	0.043	0.043	0.044	0.043	0.044	0.046	0.049	0.045	0.044
H	0.043	0.044	0.045	0.044	0.044	0.045	0.043	0.044	0.045	0.046	0.045	0.045

## Sheet: 3-1
Raw Data{Wavelength:415.0}
	1	2	3	4	5	6	7	8	9	10	11	12
A	0.046	0.045	0.047	0.047	0.045	0.052	0.049	0.049	0.051	0.05	0.05	0.046
B	0.044	2.123	2.109	2.119	2.15	2.104	2.215	2.191	2.218	2.228	2.24	0.043
C	0.044	2.104	1.946	2.195	2.181	2.111	2.252	1.62	1.698	1.282	0.155	0.043
D	0.05	2.375	1.893	1.806		0.458	0.052	0.051	0.051	0.05	0.048	0.049
E	0.044	0.042	0.043	0.042	0.043	0.044	0.044	0.044	0.045	0.043	0.045	0.042
F	0.045	0.043	0.044	0.044	0.044	0.045	0.045	0.045	0.045	0.044	0.045	0.043
G	0.046	0.044	0.044	0.045	0.044	0.046	0.045	0.045	0.047	0.049	0.046	0.044
H	0.045	0.045	0.045	0.045	0.044	0.046	0.045	0.046	0.046	0.046	0.046	0.045

## Sheet: 前三次实验整合
		2.298	1.122	0.541	0.339	0.182
		2.288	1.624	1.704	1.283	0.158
		2.375	1.893	1.806		0.458
	average	2.32033	1.54633	1.35033	0.811	0.266
	SD	0.047606	0.391324	0.702756	0.667509	0.166709

## Sheet: 4-1
Raw Data{Wavelength:415.0}
	1	2	3	4	5	6	7	8	9	10	11	12
A	0.045	0.045	0.046	0.048	0.045	0.053	0.05	0.049	0.053	0.052	0.05	0.05
B	0.043	2.02	2.009	2.023	2.052	1.99	2.117	2.067	2.085	2.081	2.063	0.049
C	0.042	2.029	1.759	2.087	2.093	2.015	2.055	1.604	1.486	1.132	0.134	0.05
D	0.048	2.14	1.639	1.532	0.051	0.47	2.238	2.067	1.997	1.886	1.765	0.057
E	0.042	2.228	2.075	1.964	1.814	1.736	2.182	2.027	1.856	1.823	1.765	0.053
F	0.043	2.422	1.646	1.541	1.056	0.422	2.334	1.724	1.702	1.264	0.845	0.051
G	0.044	2.221	1.686	1.635	0.829	0.438	0.046	0.046	0.046	0.052	0.046	0.046
H	0.043	0.043	0.044	0.045	0.044	0.044	0.044	0.044	0.045	0.046	0.045	0.045

## Sheet: 5-1
Raw Data{Wavelength:415.0}
	1	2	3	4	5	6	7	8	9	10	11	12
A	0.044	0.045	0.046	0.047	0.045	0.052	0.049	0.049	0.053	0.051	0.05	0.049
B	0.043	2.021	2.015	2.03	2.05	1.989	2.114	2.063	2.084	2.082	2.066	0.047
C	0.042	2.021	1.758	2.093	2.079	2.015	2.048	1.595	1.474	1.121	0.132	0.047
D	0.048	2.143	1.639	1.53	0.052	0.473	2.263	2.053	2.01	1.889	1.765	0.055
E	0.042	2.221	2.066	1.964	1.812	1.743	2.195	2.022	1.857	1.819	1.757	0.048
F	0.043	2.405	1.624	1.537	1.034	0.399	2.31	1.713	1.689	1.256	0.824	0.048
G	0.044	2.215	1.668	1.629	0.809	0.424	0.045	0.045	0.046	0.051	0.045	0.045
H	0.043	0.044	0.044	0.045	0.043	0.043	0.044	0.044	0.045	0.046	0.044	0.045

## Sheet: 6-1
Raw Data{Wavelength:415.0}
	1	2	3	4	5	6	7	8	9	10	11	12
A	0.045	0.045	0.046	0.047	0.044	0.053	0.05	0.05	0.054	0.053	0.051	0.049
B	0.042	2.033	2.007	2.035	2.061	2.012	2.137	2.087	2.095	2.09	2.063	0.047
C	0.042	2.032	1.758	2.094	2.098	2.031	2.078	1.606	1.47	1.114	0.131	0.046
D	0.048	2.138	1.631	1.527	0.052	0.472	2.272	2.067	2.002	1.883	1.758	0.054
E	0.041	2.196	2.051	1.957	1.813	1.749	2.192	2.011	1.841	1.805	1.75	0.048
F	0.042	2.373	1.598	1.537	1.017	0.391	2.301	1.708	1.679	1.257	0.826	0.047
G	0.043	2.178	1.659	1.635	0.799	0.424	0.045	0.045	0.046	0.051	0.044	0.045
H	0.042	0.043	0.043	0.044	0.043	0.044	0.044	0.043	0.044	0.045	0.044	0.045

## Sheet: Sheet2
											average	SD
	n=3	2.375	1.893	1.806		0.458				0	2.325	0.129457
	n=4	2.422	1.646	1.541	1.056	0.422				10	1.73267	0.139005
	n=6	2.178	1.659	1.635	0.799	0.424				20	1.66067	0.134352
	average	2.325	1.73267	1.66067	0.9275	0.434667				40	0.9275	0.181726
	SD	0.129457	0.139005	0.134352	0.181726	0.020232				100	0.434667	0.020232
