# Supplementary material for: Intervention effects of five cations and their correction on hemolytic activity of tentacle extract from the jellyfish Cyanea capillata
Source: PeerJ. 2017 May 9;5:e3338. doi: 10.7717/peerj.3338 (PMC5426461; doi:10.7717/peerj.3338)
Supplement: Supplemental Information 12 [file peerj-05-3338-s012.xlsx]

## Sheet: 1-1
Raw Data{Wavelength:415.0}
	1	2	3	4	5	6	7	8	9	10	11	12
A	0.047	0.048	0.047	0.049	0.047	0.053	0.047	0.048	0.05	0.047	0.048	0.051
B	0.042	1.949	1.753	1.718	1.657	1.628	1.405	0.607	0.568	0.61	0.691	0.043
C	0.042	2.284	1.399	1.076	0.918	0.822	2.172	2.069	2.035	1.899	1.758	0.043
D	0.048	2.364	1.951	1.409	0.948	0.534	0.049	0.049	0.048	0.047	0.047	0.049
E	0.041	0.042	0.041	0.042	0.041	0.042	0.041	0.043	0.042	0.041	0.042	0.043
F	0.042	0.043	0.043	0.043	0.044	0.044	0.042	0.044	0.043	0.042	0.043	0.044
G	0.043	0.044	0.043	0.044	0.043	0.044	0.042	0.044	0.043	0.043	0.043	0.043
H	0.043	0.044	0.043	0.045	0.044	0.043	0.042	0.044	0.044	0.043	0.043	0.044

## Sheet: 2-1
Raw Data{Wavelength:415.0}
	1	2	3	4	5	6	7	8	9	10	11	12
A	0.046	0.046	0.046	0.047	0.044	0.05	0.046	0.045	0.049	0.046	0.047	0.048
B	0.042	1.943	1.741	1.706	1.648	1.627	1.401	0.605	0.57	0.613	0.699	0.042
C	0.042	2.234	1.33	1.035	0.912	0.827	2.172	2.029	1.999	1.861	1.76	0.042
D	0.048	2.304	1.915	1.392	0.945	0.515	2.335	1.524	1.062	0.941	0.827	0.048
E	0.042	2.149	1.516	1.006	0.874	0.783	0.042	0.041	0.042	0.042	0.043	0.043
F	0.043	0.043	0.043	0.043	0.044	0.043	0.043	0.042	0.043	0.043	0.043	0.043
G	0.043	0.043	0.043	0.043	0.043	0.042	0.043	0.042	0.043	0.044	0.044	0.043
H	0.043	0.044	0.044	0.045	0.043	0.043	0.044	0.043	0.044	0.044	0.044	0.044

## Sheet: 3-1
Raw Data{Wavelength:415.0}
	1	2	3	4	5	6	7	8	9	10	11	12
A	0.047	0.048	0.048	0.049	0.046	0.052	0.049	0.049	0.051	0.049	0.05	0.051
B	0.043	1.956	1.745	1.711	1.644	1.628	1.401	0.607	0.564	0.61	0.7	0.044
C	0.042	2.176	1.265	0.966	0.836	0.813	2.161	1.928	1.889	1.745	1.648	0.043
D	0.048	2.195	1.855	1.329	0.853	0.539	2.286	1.466	1.031	0.843	0.806	0.05
E	0.042	2.152	1.397	0.992	0.815	0.736	0.043	0.043	0.042	0.042	0.044	0.044
F	0.043	0.043	0.043	0.043	0.044	0.044	0.043	0.044	0.043	0.043	0.044	0.043
G	0.043	0.044	0.043	0.043	0.043	0.043	0.044	0.044	0.044	0.045	0.045	0.044
H	0.043	0.045	0.044	0.045	0.043	0.044	0.045	0.045	0.044	0.044	0.045	0.045

## Sheet: Sheet1
		0	20mM	40mM	80mM	120mM				average	SD
		2.284	1.399	1.076	0.918	0.822			0	2.257	0.0944405
		2.335	1.524	1.062	0.941	0.827			20	1.44	0.072753
		2.152	1.397	0.992	0.815	0.736			40	1.04333	0.0450037
	average	2.257	1.44	1.04333	0.891333	0.795			80	0.891333	0.0670994
	SD	0.0944405	0.072753	0.0450037	0.0670994	0.0511566			120	0.795	0.0511566
