# Supplementary material for: Intervention effects of five cations and their correction on hemolytic activity of tentacle extract from the jellyfish Cyanea capillata
Source: PeerJ. 2017 May 9;5:e3338. doi: 10.7717/peerj.3338 (PMC5426461; doi:10.7717/peerj.3338)
Supplement: Supplemental Information 13 [file peerj-05-3338-s013.xlsx]

## Sheet: Fe与Fe+Hb
Sample ID	User ID	Date	Time	Baseline	Cursor 1 Pos.	Cursor 1 Abs.	Cursor 2 Pos.	Cursor 2 Abs.	Measure Type	Serial#	Config.	Norm nm	Norm Abs	220	223	226	229	232	235	238	241	244	247	250	253	256	259	262	265	268	271	274	277	280	283	286	289	292	295	298	301	304	307	310	313	316	319	322	325
Fe120+Hb-1	Default	2017-3-21	10:01	0	300	0.367	701	0	Measure	USB2G35041BF985	1.004101/-0.44/128/24	724	0.01	1.186	1.183	0.834	1.404	1.363	1.295	0.969	0.901	0.877	0.834	0.815	0.76	0.733	0.698	0.664	0.65	0.614	0.576	0.561	0.542	0.523	0.505	0.477	0.454	0.429	0.401	0.379	0.362	0.352	0.341	0.328	0.326	0.324	0.327	0.327	0.329
Fe120+Hb-2	Default	2017-3-21	10:02	0	300	0.391	701	0.001	Measure	USB2G35041BF985	1.004101/-0.44/128/24	724	0.014	0.53	0.696	0.843	1.345	1.341	1.166	1.062	0.923	0.937	0.901	0.867	0.821	0.776	0.724	0.702	0.669	0.641	0.602	0.58	0.566	0.54	0.515	0.492	0.469	0.451	0.427	0.403	0.387	0.377	0.366	0.355	0.351	0.348	0.347	0.345	0.35
Fe120+Hb-3	Default	2017-3-21	10:04	0	300	0.334	701	0.002	Measure	USB2G35041BF985	1.004101/-0.44/128/24	704	0.009	0.439	0.778	2.174	1.531	1.305	1.069	0.891	0.835	0.796	0.764	0.726	0.702	0.651	0.641	0.612	0.582	0.566	0.537	0.515	0.501	0.486	0.467	0.438	0.414	0.392	0.367	0.347	0.33	0.315	0.309	0.301	0.299	0.294	0.298	0.304	0.308
Fe120+Hb-4	Default	2017-3-21	10:06	0	300	0.381	701	0.001	Measure	USB2G35041BF985	1.004101/-0.44/128/24	724	0.017	0.756	0.946	1.161	1.258	1.27	1.113	0.936	0.854	0.847	0.8	0.778	0.753	0.721	0.694	0.667	0.641	0.611	0.585	0.565	0.547	0.53	0.51	0.489	0.462	0.437	0.418	0.395	0.377	0.365	0.356	0.346	0.343	0.342	0.339	0.343	0.347
													average	0.72775	0.90075	1.253	1.3845	1.31975	1.16075	0.9645	0.87825	0.86425	0.82475	0.7965	0.759	0.72025	0.68925	0.66125	0.6355	0.608	0.575	0.55525	0.539	0.51975	0.49925	0.474	0.44975	0.42725	0.40325	0.381	0.364	0.35225	0.343	0.3325	0.32975	0.327	0.32775	0.32975	0.3335
												Hb + Fe²⁺ (120 mM)	SD
Fe40+Hb-1	Default	2017-3-21	10:09	0	300	0.196	701	0.001	Measure	USB2G35041BF985	1.004101/-0.44/128/24	710	0.003	0.656	0.672	0.972	1.04	0.898	0.7	0.56	0.467	0.43	0.397	0.378	0.37	0.364	0.355	0.349	0.343	0.337	0.331	0.328	0.321	0.31	0.301	0.283	0.264	0.247	0.223	0.207	0.193	0.183	0.177	0.174	0.175	0.179	0.184	0.188	0.195
Fe40+Hb-2	Default	2017-3-21	10:10	0	300	0.341	701	0	Measure	USB2G35041BF985	1.004101/-0.44/128/24	703	0.086	1.264	0.965	0.938	1.422	1.195	0.847	0.751	0.693	0.632	0.591	0.584	0.563	0.56	0.548	0.534	0.53	0.526	0.514	0.5	0.493	0.476	0.462	0.447	0.426	0.403	0.376	0.353	0.337	0.324	0.313	0.308	0.305	0.307	0.312	0.311	0.318
Fe40+Hb-2	Default	2017-3-21	10:11	0	300	0.195	701	0	Measure	USB2G35041BF985	1.004101/-0.44/128/24	724	0.006	0.636	0.926	1.176	1.08	0.941	0.734	0.577	0.479	0.428	0.399	0.385	0.377	0.365	0.356	0.346	0.345	0.339	0.328	0.323	0.317	0.309	0.298	0.281	0.262	0.245	0.224	0.206	0.192	0.183	0.177	0.174	0.176	0.178	0.181	0.187	0.192
Fe40+Hb-3	Default	2017-3-21	10:11	0	300	0.194	701	0.002	Measure	USB2G35041BF985	1.004101/-0.44/128/24	741	0.004	0.476	1.038	1.049	1.041	0.929	0.698	0.585	0.484	0.438	0.395	0.382	0.373	0.37	0.355	0.349	0.341	0.336	0.328	0.32	0.311	0.302	0.294	0.278	0.261	0.242	0.222	0.204	0.19	0.18	0.176	0.173	0.175	0.174	0.177	0.181	0.19
Fe40+Hb-4	Default	2017-3-21	10:12	0	300	0.205	701	0.003	Measure	USB2G35041BF985	1.004101/-0.44/128/24	739	0.003	0.539	1.024	0.923	0.991	0.945	0.708	0.583	0.474	0.44	0.408	0.393	0.383	0.375	0.367	0.356	0.356	0.349	0.335	0.332	0.325	0.319	0.307	0.29	0.272	0.253	0.231	0.215	0.201	0.19	0.184	0.181	0.182	0.184	0.189	0.192	0.199
												Hb + Fe²⁺ (40 mM)	average	0.7142	0.925	1.0116	1.1148	0.9816	0.7374	0.6112	0.5194	0.4736	0.438	0.4244	0.4132	0.4068	0.3962	0.3868	0.383	0.3774	0.3672	0.3606	0.3534	0.3432	0.3324	0.3158	0.297	0.278	0.2552	0.237	0.2226	0.212	0.2054	0.202	0.2026	0.2044	0.2086	0.2118	0.2188
													SD
Fe20+Hb-1	Default	2017-3-21	10:14	0	300	0.188	701	0.001	Measure	USB2G35041BF985	1.004101/-0.44/128/24	723	0.001	0.672	0.606	0.79	1.079	0.931	0.675	0.526	0.437	0.395	0.367	0.348	0.339	0.337	0.326	0.323	0.325	0.322	0.318	0.314	0.309	0.301	0.29	0.272	0.254	0.235	0.213	0.198	0.184	0.174	0.169	0.165	0.167	0.171	0.174	0.18	0.185
Fe20+Hb-2	Default	2017-3-21	10:14	0	300	0.23	701	0.017	Measure	USB2G35041BF985	1.004101/-0.44/128/24	725	-0.02	0.351	0.639	0.882	1.014	0.927	0.708	0.559	0.488	0.441	0.413	0.4	0.381	0.368	0.373	0.377	0.374	0.367	0.371	0.37	0.356	0.345	0.337	0.324	0.304	0.285	0.263	0.238	0.228	0.214	0.208	0.209	0.21	0.212	0.219	0.223	0.228
Fe20+Hb-3	Default	2017-3-21	10:15	0	300	0.249	701	0.004	Measure	USB2G35041BF985	1.004101/-0.44/128/24	741	0.006	0.56	0.864	0.822	1.126	1.003	0.761	0.632	0.539	0.499	0.462	0.447	0.428	0.418	0.416	0.406	0.406	0.398	0.387	0.378	0.37	0.363	0.352	0.332	0.314	0.298	0.275	0.259	0.246	0.232	0.227	0.223	0.224	0.226	0.228	0.233	0.239
Fe20+Hb-4	Default	2017-3-21	10:16	0	300	0.182	701	0.003	Measure	USB2G35041BF985	1.004101/-0.44/128/24	710	0.004	0.879	0.807	0.932	0.942	0.885	0.646	0.506	0.427	0.392	0.353	0.339	0.338	0.337	0.322	0.32	0.321	0.317	0.309	0.306	0.3	0.293	0.281	0.267	0.248	0.231	0.21	0.192	0.179	0.17	0.164	0.16	0.162	0.165	0.17	0.174	0.179
												Hb + Fe²⁺ (20 mM)	average	0.6155	0.729	0.8565	1.04025	0.9365	0.6975	0.55575	0.47275	0.43175	0.39875	0.3835	0.3715	0.365	0.35925	0.3565	0.3565	0.351	0.34625	0.342	0.33375	0.3255	0.315	0.29875	0.28	0.26225	0.24025	0.22175	0.20925	0.1975	0.192	0.18925	0.19075	0.1935	0.19775	0.2025	0.20775
													SD
Fe120-4	Default	2017-3-21	10:24	0	300	0.179	701	0.002	Measure	USB2G35041BF985	1.004101/-0.44/128/24	649	0.004	0.334	0.384	0.371	0.409	0.415	0.404	0.386	0.386	0.389	0.37	0.36	0.338	0.314	0.286	0.265	0.241	0.223	0.207	0.198	0.19	0.185	0.183	0.181	0.179	0.177	0.179	0.181	0.178	0.175	0.174	0.171	0.168	0.166	0.162	0.159	0.158
Fe120-3	Default	2017-3-21	10:25	0	300	0.174	701	0.003	Measure	USB2G35041BF985	1.004101/-0.44/128/24	712	0.006	0.4	0.358	0.359	0.409	0.413	0.4	0.394	0.378	0.38	0.369	0.355	0.34	0.311	0.281	0.26	0.239	0.219	0.201	0.191	0.183	0.178	0.177	0.176	0.174	0.173	0.173	0.175	0.173	0.171	0.168	0.166	0.164	0.162	0.16	0.157	0.153
Fe120-2	Default	2017-3-21	10:26	0	300	0.184	701	0.004	Measure	USB2G35041BF985	1.004101/-0.44/128/24	719	0.007	0.303	0.386	0.397	0.419	0.418	0.396	0.391	0.389	0.392	0.379	0.365	0.343	0.317	0.291	0.269	0.245	0.227	0.21	0.202	0.192	0.187	0.187	0.185	0.184	0.183	0.183	0.184	0.184	0.182	0.179	0.175	0.174	0.172	0.169	0.167	0.164
Fe120-1	Default	2017-3-21	10:27	0	300	0.181	701	0.001	Measure	USB2G35041BF985	1.004101/-0.44/128/24	740	0.01	0.329	0.398	0.407	0.431	0.426	0.412	0.396	0.395	0.392	0.377	0.365	0.345	0.321	0.29	0.266	0.248	0.226	0.205	0.199	0.192	0.184	0.181	0.181	0.181	0.181	0.181	0.182	0.18	0.177	0.176	0.173	0.173	0.171	0.169	0.165	0.16
												Fe²⁺ (120 mM)	average	0.3415	0.3815	0.3835	0.417	0.418	0.403	0.39175	0.387	0.38825	0.37375	0.36125	0.3415	0.31575	0.287	0.265	0.24325	0.22375	0.20575	0.1975	0.18925	0.1835	0.182	0.18075	0.1795	0.1785	0.179	0.1805	0.17875	0.17625	0.17425	0.17125	0.16975	0.16775	0.165	0.162	0.15875
													SD
Fe40-1	Default	2017-3-21	10:20	0	300	0.25	701	0	Measure	USB2G35041BF985	1.004101/-0.44/128/24	718	0.01	0.418	0.433	0.446	0.524	0.546	0.52	0.502	0.499	0.497	0.481	0.47	0.442	0.413	0.386	0.358	0.33	0.307	0.287	0.275	0.265	0.258	0.257	0.255	0.254	0.251	0.25	0.252	0.249	0.244	0.241	0.238	0.237	0.233	0.231	0.228	0.224
Fe40-2	Default	2017-3-21	10:21	0	300	0.063	701	0.019	Measure	USB2G35041BF985	1.004101/-0.44/128/24	411	-0.023	0.227	0.286	0.27	0.3	0.28	0.27	0.27	0.263	0.267	0.252	0.244	0.22	0.199	0.171	0.149	0.126	0.106	0.091	0.082	0.074	0.069	0.067	0.064	0.063	0.062	0.061	0.063	0.063	0.06	0.059	0.056	0.056	0.054	0.052	0.05	0.049
Fe40-3	Default	2017-3-21	10:22	0	300	0.097	701	0.002	Measure	USB2G35041BF985	1.004101/-0.44/128/24	675	0.003	0.16	0.237	0.237	0.246	0.245	0.23	0.223	0.227	0.226	0.216	0.209	0.196	0.184	0.166	0.152	0.138	0.127	0.115	0.11	0.104	0.1	0.099	0.1	0.098	0.097	0.097	0.097	0.098	0.096	0.094	0.093	0.093	0.091	0.091	0.09	0.087
Fe40-4	Default	2017-3-21	10:23	0	300	0.041	701	0.003	Measure	USB2G35041BF985	1.004101/-0.44/128/24	573	-0.003	0.112	0.124	0.129	0.134	0.135	0.13	0.125	0.123	0.123	0.117	0.115	0.105	0.098	0.086	0.077	0.066	0.059	0.053	0.049	0.047	0.044	0.043	0.043	0.041	0.041	0.042	0.043	0.041	0.04	0.04	0.038	0.038	0.037	0.039	0.037	0.036
												Fe²⁺ (40 mM)	average	0.22925	0.27	0.2705	0.301	0.3015	0.2875	0.28	0.278	0.27825	0.2665	0.2595	0.24075	0.2235	0.20225	0.184	0.165	0.14975	0.1365	0.129	0.1225	0.11775	0.1165	0.1155	0.114	0.11275	0.1125	0.11375	0.11275	0.11	0.1085	0.10625	0.106	0.10375	0.10325	0.10125	0.099
													SD
Fe20-1	Default	2017-3-21	10:18	0	300	0.037	701	0.002	Measure	USB2G35041BF985	1.004101/-0.44/128/24	573	-0.007	0.048	0.067	0.073	0.079	0.079	0.076	0.076	0.073	0.072	0.068	0.068	0.063	0.062	0.054	0.051	0.048	0.045	0.04	0.041	0.04	0.038	0.039	0.038	0.038	0.037	0.038	0.038	0.037	0.035	0.034	0.033	0.033	0.032	0.032	0.031	0.03
Fe20-2	Default	2017-3-21	10:18	0	300	0.033	701	0.002	Measure	USB2G35041BF985	1.004101/-0.44/128/24	574	0	0.053	0.045	0.068	0.076	0.078	0.077	0.071	0.069	0.07	0.066	0.065	0.06	0.057	0.053	0.049	0.045	0.042	0.036	0.036	0.035	0.033	0.033	0.034	0.032	0.032	0.032	0.032	0.033	0.031	0.031	0.029	0.03	0.029	0.029	0.028	0.027
Fe20-3	Default	2017-3-21	10:19	0	300	0.033	701	0.002	Measure	USB2G35041BF985	1.004101/-0.44/128/24	572	-0.005	0.051	0.061	0.072	0.08	0.076	0.069	0.069	0.067	0.066	0.064	0.063	0.059	0.056	0.049	0.047	0.042	0.039	0.036	0.036	0.035	0.033	0.034	0.034	0.032	0.032	0.033	0.033	0.033	0.032	0.031	0.029	0.029	0.028	0.029	0.028	0.027
												Fe²⁺ (20 mM)	average	0.0506667	0.0576667	0.071	0.0783333	0.0776667	0.074	0.072	0.0696667	0.0693333	0.066	0.0653333	0.0606667	0.0583333	0.052	0.049	0.045	0.042	0.0373333	0.0376667	0.0366667	0.0346667	0.0353333	0.0353333	0.034	0.0336667	0.0343333	0.0343333	0.0343333	0.0326667	0.032	0.0303333	0.0306667	0.0296667	0.03	0.029	0.028
													SD
	Hb
	0.6288
	0.798
	0.764
	0.8682
	0.7814
	0.5324
	0.3872
	0.283
	0.2352
	0.202
	0.1928
	0.1892
	0.1932
	0.2006
	0.207
	0.2154
	0.2238
	0.2266
	0.2282
	0.226
	0.2202
	0.214
	0.1992
	0.1814
	0.166
	0.144
	0.1272
	0.1148
	0.1074
	0.1034
	0.1058
	0.1114
	0.1174
	0.1256
	0.1342
	0.143
	0.1502
	0.1578
	0.1636
	0.1692
	0.173
	0.1756
	0.1772
	0.1758
	0.1726
	0.1664
	0.162
	0.1558
	0.1518
	0.1474
	0.1476
	0.1496
	0.1564
	0.1696
	0.187
	0.2116
	0.2428
	0.2868
	0.3308
	0.3824
	0.4472
	0.534
	0.6168
	0.6984
	0.7734
	0.7942
	0.7658
	0.6804
	0.5792
	0.475
	0.366
	0.2924
	0.234
	0.1936
	0.1642
	0.1376
	0.118
	0.103
	0.0918
	0.081
	0.0724
	0.0674
	0.0622
	0.0578
	0.0536
	0.0494
	0.047
	0.0456
	0.0398
	0.0374
	0.0368
	0.0376
	0.0388
	0.0356
	0.0358
	0.0352
	0.0336
	0.0358
	0.0354
	0.0376
	0.042
	0.0472
	0.0558
	0.0662
	0.0726
	0.0824
	0.0926
	0.0934
	0.0926
	0.088
	0.0784
	0.0694
	0.0592
	0.0568
	0.0574
	0.061
	0.0688
	0.0798
	0.0896
	0.0982
	0.0904
	0.0712
	0.0478
	0.032
	0.0222
	0.0146
	0.0092
	0.0098
	0.0108
	0.007
	0.0032
	0.0034
	0.0038
	0.006
	0.0088
	0.0078
	0.0042
	0.0066
	0.0052
	0.0042
	0.0066
	0.0062
	0.0024
	-0.001
	0.0004
	0.0026
	0.0024
	0.002
	0.0046
	0.0046
	0.0048
	0.0032
	0.0004
	0.0048
	0.0052
	0.0046
	0.0024
	0.0012
	0.0018
	0.0024
	0.003
	0.001
	0.0008
	0.0022
	0.0014
	0.0028
	0.0022
	0.0022
	0.0004
	0.003
	0.004
	0.005
	0.0048
	0.0036
	0.0032
	0.0052
	0.004
[truncated: 141 more columns]

## Sheet: Hb
Sample ID	User ID	Date	Time	Baseline	Cursor 1 Pos.	Cursor 1 Abs.	Cursor 2 Pos.	Cursor 2 Abs.	Measure Type	Serial#	Config.	Norm nm	Norm Abs	220	223	226	229	232	235	238	241	244	247	250	253	256	259	262	265	268	271	274	277	280	283	286	289	292	295	298	301	304	307	310	313	316	319	322	325
Hb	Default	2017-3-21	9:44	0	300	0.114	701	0	Measure	USB2G35041BF985	1.004101/-0.44/128/24	737	0.002	0.46	0.743	0.793	0.876	0.784	0.527	0.384	0.284	0.237	0.202	0.192	0.188	0.193	0.199	0.205	0.213	0.22	0.224	0.225	0.222	0.218	0.211	0.195	0.178	0.163	0.141	0.124	0.111	0.104	0.1	0.103	0.109	0.115	0.123	0.13	0.139
Hb-2	Default	2017-3-21	9:55	0	300	0.123	701	0.004	Measure	USB2G35041BF985	1.004101/-0.44/128/24	649	-0.003	0.938	1.114	0.834	0.879	0.801	0.547	0.398	0.293	0.246	0.212	0.203	0.201	0.206	0.211	0.215	0.224	0.232	0.231	0.236	0.233	0.225	0.222	0.205	0.187	0.172	0.15	0.133	0.12	0.112	0.108	0.111	0.115	0.122	0.13	0.138	0.146
Hb-3	Default	2017-3-21	9:56	0	300	0.118	701	0.002	Measure	USB2G35041BF985	1.004101/-0.44/128/24	650	-0.002	0.564	0.576	0.63	0.828	0.761	0.523	0.385	0.281	0.232	0.2	0.191	0.188	0.193	0.198	0.205	0.216	0.223	0.227	0.227	0.225	0.22	0.214	0.2	0.181	0.166	0.144	0.127	0.116	0.108	0.104	0.106	0.112	0.116	0.126	0.135	0.145
Hb-4	Default	2017-3-21	9:59	0	300	0.118	701	0.003	Measure	USB2G35041BF985	1.004101/-0.44/128/24	649	-0.002	0.408	0.855	0.844	0.893	0.812	0.546	0.387	0.277	0.232	0.198	0.189	0.186	0.187	0.199	0.206	0.214	0.224	0.227	0.229	0.228	0.22	0.213	0.2	0.182	0.166	0.144	0.128	0.115	0.108	0.103	0.106	0.111	0.119	0.126	0.135	0.145
Hb-4	Default	2017-3-21	10:08	0	300	0.115	701	0.002	Measure	USB2G35041BF985	1.004101/-0.44/128/24	649	-0.004	0.774	0.702	0.719	0.865	0.749	0.519	0.382	0.28	0.229	0.198	0.189	0.183	0.187	0.196	0.204	0.21	0.22	0.224	0.224	0.222	0.218	0.21	0.196	0.179	0.163	0.141	0.124	0.112	0.105	0.102	0.103	0.11	0.115	0.123	0.133	0.14
													average	0.6288	0.798	0.764	0.8682	0.7814	0.5324	0.3872	0.283	0.2352	0.202	0.1928	0.1892	0.1932	0.2006	0.207	0.2154	0.2238	0.2266	0.2282	0.226	0.2202	0.214	0.1992	0.1814	0.166	0.144	0.1272	0.1148	0.1074	0.1034	0.1058	0.1114	0.1174	0.1256	0.1342	0.143
													SD	0.222561	0.202873	0.0896131	0.0245906	0.0264254	0.0131833	0.00630079	0.00612372	0.00668581	0.00583095	0.00584808	0.00690652	0.00775887	0.00594138	0.00452769	0.00527257	0.00491935	0.00288097	0.00476445	0.00463681	0.00286356	0.00474342	0.00396232	0.00350714	0.00367423	0.00367423	0.00370135	0.00356371	0.0031305	0.00296648	0.00327109	0.00230217	0.00304959	0.00288097	0.00294958	0.00324037
波长	average	SD
220	0.6288	0.222561
223	0.798	0.202873
226	0.764	0.0896131
229	0.8682	0.0245906
232	0.7814	0.0264254
235	0.5324	0.0131833
238	0.3872	0.00630079
241	0.283	0.00612372
244	0.2352	0.00668581
247	0.202	0.00583095
250	0.1928	0.00584808
253	0.1892	0.00690652
256	0.1932	0.00775887
259	0.2006	0.00594138
262	0.207	0.00452769
265	0.2154	0.00527257
268	0.2238	0.00491935
271	0.2266	0.00288097
274	0.2282	0.00476445
277	0.226	0.00463681
280	0.2202	0.00286356
283	0.214	0.00474342
286	0.1992	0.00396232
289	0.1814	0.00350714
292	0.166	0.00367423
295	0.144	0.00367423
298	0.1272	0.00370135
301	0.1148	0.00356371
304	0.1074	0.0031305
307	0.1034	0.00296648
310	0.1058	0.00327109
313	0.1114	0.00230217
316	0.1174	0.00304959
319	0.1256	0.00288097
322	0.1342	0.00294958
325	0.143	0.00324037
328	0.1502	0.00238747
331	0.1578	0.00192354
334	0.1636	0.00260768
337	0.1692	0.00327109
340	0.173	0.00308221
343	0.1756	0.00260768
346	0.1772	0.00356371
349	0.1758	0.00327109
352	0.1726	0.00296648
355	0.1664	0.00230217
358	0.162	0.00291548
361	0.1558	0.00383406
364	0.1518	0.00376829
367	0.1474	0.00296648
370	0.1476	0.00304959
373	0.1496	0.00270185
376	0.1564	0.00194936
379	0.1696	0.00296648
382	0.187	0.003
385	0.2116	0.00350714
388	0.2428	0.00396232
391	0.2868	0.00402492
394	0.3308	0.00426615
397	0.3824	0.00466905
400	0.4472	0.00526308
403	0.534	0.00620484
406	0.6168	0.00756307
409	0.6984	0.011149
412	0.7734	0.0119917
415	0.7942	0.00752994
418	0.7658	0.00798123
421	0.6804	0.00901665
424	0.5792	0.00840833
427	0.475	0.00728011
430	0.366	0.00561249
433	0.2924	0.00536656
436	0.234	0.00424264
439	0.1936	0.00364692
442	0.1642	0.00334664
445	0.1376	0.00343511
448	0.118	0.002
451	0.103	0.00187083
454	0.0918	0.00216795
457	0.081	0.00158114
460	0.0724	0.000894427
463	0.0674	0.00114018
466	0.0622	0.00130384
469	0.0578	0.00109545
472	0.0536	0.00151658
475	0.0494	0.00134164
478	0.047	0.00122474
481	0.0456	0.00151658
484	0.0398	0.00083666
487	0.0374	0.000894427
490	0.0368	0.000447214
493	0.0376	0.00167332
496	0.0388	0.00216795
499	0.0356	0.00167332
502	0.0358	0.00164317
505	0.0352	0.00192354
508	0.0336	0.00114018
511	0.0358	0.00216795
514	0.0354	0.00151658
517	0.0376	0.000894427
520	0.042	0.00122474
523	0.0472	0.00164317
526	0.0558	0.00130384
529	0.0662	0.00238747
532	0.0726	0.00114018
535	0.0824	0.00151658
538	0.0926	0.00296648
541	0.0934	0.00230217
544	0.0926	0.00134164
547	0.088	0.00273861
550	0.0784	0.00270185
553	0.0694	0.00194936
556	0.0592	0.00083666
559	0.0568	0.00130384
562	0.0574	0.00134164
565	0.061	0.00122474
568	0.0688	0.00109545
571	0.0798	0.00109545
574	0.0896	0.00114018
577	0.0982	0.00192354
580	0.0904	0.00260768
583	0.0712	0.00192354
586	0.0478	0.00192354
589	0.032	0.003
592	0.0222	0.00294958
595	0.0146	0.00207364
598	0.0092	0.00130384
601	0.0098	0.00277489
604	0.0108	0.00327109
607	0.007	0.00223607
610	0.0032	0.00109545
613	0.0034	0.000894427
616	0.0038	0.00130384
619	0.006	0.00234521
622	0.0088	0.00349285
625	0.0078	0.00303315
628	0.0042	0.00130384
631	0.0066	0.00270185
634	0.0052	0.00192354
637	0.0042	0.00238747
640	0.0066	0.00320936
643	0.0062	0.00327109
646	0.0024	0.000894427
649	-0.001	0
652	0.0004	0.000547723
655	0.0026	0.00151658
658	0.0024	0.00181659
661	0.002	0.001
664	0.0046	0.00167332
667	0.0046	0.00167332
670	0.0048	0.00216795
673	0.0032	0.00130384
676	0.0004	0.000894427
679	0.0048	0.00277489
682	0.0052	0.00248998
685	0.0046	0.00207364
688	0.0024	0.00167332
691	0.0012	0.00083666
694	0.0018	0.00083666
697	0.0024	0.000894427
700	0.003	0.00122474
703	0.001	0.00141421
706	0.0008	0.00109545
709	0.0022	0.00130384
712	0.0014	0.00114018
715	0.0028	0.00130384
718	0.0022	0.00109545
721	0.0022	0.00148324
724	0.0004	0.000894427
727	0.003	0.00158114
730	0.004	0.00141421
733	0.005	0.00316228
736	0.0048	0.00303315
739	0.0036	0.00167332
742	0.0032	0.00130384
745	0.0052	0.00204939
748	0.004	0.00244949
[truncated: 141 more columns]

## Sheet: Cu与Cu+Hb 
Sample ID	User ID	Date	Time	Baseline	Cursor 1 Pos.	Cursor 1 Abs.	Cursor 2 Pos.	Cursor 2 Abs.	Measure Type	Serial#	Config.	Norm nm	Norm Abs	220	223	226	229	232	235	238	241	244	247	250	253	256	259	262	265	268	271	274	277	280	283	286	289	292	295	298	301	304	307	310	313	316	319	322	325
Cu120m+Hb-1	Default	2017-3-21	10:28	0	300	0.449	701	0.062	Measure	USB2G35041BF985	1.004101/-0.44/128/24	613	0.033	0.373	0.151	0.383	1.387	2.015	0.878	1.121	2.039	1.61	1.54	1.659	1.434	1.855	2.205	1.856	1.763	1.804	1.759	1.722	1.487	1.323	1.098	0.94	0.82	0.704	0.59	0.499	0.431	0.366	0.316	0.276	0.252	0.226	0.21	0.196	0.188
Cu120m+Hb-2	Default	2017-3-21	10:29	0	300	0.452	701	0.061	Measure	USB2G35041BF985	1.004101/-0.44/128/24	612	0.036	0.278	0.246	0.763	1.707	1.335	1.178	1.174	1.801	2.034	2.216	3.584	NaN	1.616	1.346	2.039	1.719	1.841	1.878	1.886	1.559	1.344	1.166	0.956	0.829	0.712	0.598	0.504	0.436	0.37	0.325	0.281	0.251	0.227	0.21	0.196	0.189
Cu120m+Hb-3	Default	2017-3-21	10:30	0	300	0.451	701	0.059	Measure	USB2G35041BF985	1.004101/-0.44/128/24	607	0.04	NaN	NaN	0.657	0.686	0.78	1.39	1.163	1.472	1.457	1.556	1.79	1.254	1.394	1.906	1.969	1.914	1.902	1.975	1.707	1.534	1.308	1.165	0.97	0.835	0.709	0.59	0.503	0.433	0.373	0.323	0.284	0.254	0.227	0.211	0.197	0.187
												Hb +Cu²⁺ (120 µM)	Average	0.3255	0.1985	0.601	1.26	1.37667	1.14867	1.15267	1.77067	1.70033	1.77067	2.34433	1.344	1.62167	1.819	1.95467	1.79867	1.849	1.87067	1.77167	1.52667	1.325	1.143	0.955333	0.828	0.708333	0.592667	0.502	0.433333	0.369667	0.321333	0.280333	0.252333	0.226667	0.210333	0.196333	0.188
													SD
Cu60m+Hb-1	Default	2017-3-21	10:33	0	300	0.333	701	0.018	Measure	USB2G35041BF985	1.004101/-0.44/128/24	616	0.046	0.465	0.694	0.696	1.111	1.292	1.479	1.257	1.537	1.814	1.909	2.917	1.888	1.752	1.679	1.674	1.462	1.39	1.256	1.116	0.966	0.843	0.742	0.648	0.567	0.491	0.415	0.364	0.321	0.284	0.255	0.23	0.216	0.207	0.203	0.196	0.195
Cu60m+Hb-1	Default	2017-3-21	10:36	0	300	0.31	701	0.018	Measure	USB2G35041BF985	1.004101/-0.44/128/24	614	0.042	NaN	0.653	0.708	1.113	1.42	1.851	1.648	1.67	1.777	2.119	2.487	2	1.698	1.764	1.629	1.415	1.272	1.125	1.019	0.913	0.787	0.69	0.599	0.523	0.454	0.392	0.339	0.299	0.267	0.24	0.22	0.207	0.197	0.192	0.191	0.189
Cu60m+Hb-2	Default	2017-3-21	10:36	0	300	0.351	701	0.016	Measure	USB2G35041BF985	1.004101/-0.44/128/24	614	0.049	1.299	0.456	0.482	0.99	2.174	1.654	1.386	1.655	2.443	1.89	1.995	1.562	1.439	1.656	1.731	1.459	1.429	1.28	1.12	1.006	0.88	0.766	0.669	0.58	0.511	0.441	0.381	0.338	0.303	0.275	0.249	0.237	0.223	0.216	0.211	0.209
Cu60m+Hb-3	Default	2017-3-21	10:37	0	300	0.296	701	0.015	Measure	USB2G35041BF985	1.004101/-0.44/128/24	613	0.046	0.26	0.495	0.779	1.063	1.207	1.217	2.036	2.483	1.811	1.753	1.85	1.756	1.658	1.479	1.495	1.29	1.184	1.081	0.978	0.849	0.743	0.657	0.567	0.502	0.434	0.373	0.325	0.286	0.256	0.234	0.212	0.202	0.192	0.188	0.185	0.186
												Hb + Cu²⁺ (60 µM)	Average	0.674667	0.5745	0.66625	1.06925	1.52325	1.55025	1.58175	1.83625	1.96125	1.91775	2.31225	1.8015	1.63675	1.6445	1.63225	1.4065	1.31875	1.1855	1.05825	0.9335	0.81325	0.71375	0.62075	0.543	0.4725	0.40525	0.35225	0.311	0.2775	0.251	0.22775	0.2155	0.20475	0.19975	0.19575	0.19475
													SD
Cu30m+Hb-1	Default	2017-3-21	10:39	0	300	0.28	701	0.025	Measure	USB2G35041BF985	1.004101/-0.44/128/24	608	0.052	0.543	1.022	0.578	1.332	1.624	1.134	1.18	1.531	1.873	1.81	1.768	1.798	1.629	1.748	1.674	1.428	1.186	1.117	1.031	0.875	0.763	0.661	0.579	0.495	0.427	0.361	0.309	0.269	0.237	0.21	0.19	0.178	0.166	0.162	0.158	0.155
Cu30m+Hb-1	Default	2017-3-21	10:39	0	300	0.333	701	0.026	Measure	USB2G35041BF985	1.004101/-0.44/128/24	608	0.036	0.124	0.32	0.655	1.9	2.361	1.491	1.58	1.364	1.731	1.925	2.052	1.774	1.688	1.959	1.77	1.578	1.464	1.291	1.203	1.037	0.903	0.79	0.689	0.597	0.513	0.433	0.369	0.32	0.281	0.252	0.226	0.211	0.196	0.19	0.183	0.18
Cu30m+Hb-2	Default	2017-3-21	10:40	0	300	0.224	701	0.002	Measure	USB2G35041BF985	1.004101/-0.44/128/24	708	0.031	0.754	NaN	1.556	1.408	1.557	1.447	1.235	1.219	1.24	1.216	1.187	1.091	1.104	1.03	0.96	0.877	0.783	0.685	0.625	0.564	0.511	0.457	0.406	0.359	0.316	0.275	0.242	0.218	0.199	0.185	0.173	0.169	0.164	0.165	0.167	0.174
Cu30m+Hb-3	Default	2017-3-21	10:41	0	300	0.213	701	0.003	Measure	USB2G35041BF985	1.004101/-0.44/128/24	694	0.032	0.729	0.767	0.975	1.198	1.853	1.171	1.183	1.143	1.203	1.151	1.127	1.091	1.01	0.961	0.908	0.815	0.727	0.658	0.61	0.543	0.483	0.432	0.383	0.338	0.301	0.265	0.231	0.207	0.189	0.174	0.164	0.16	0.157	0.157	0.159	0.166
												Hb + Cu²⁺ (30 µM )	Average	0.5375	0.703	0.941	1.4595	1.84875	1.31075	1.2945	1.31425	1.51175	1.5255	1.5335	1.4385	1.35775	1.4245	1.328	1.1745	1.04	0.93775	0.86725	0.75475	0.665	0.585	0.51425	0.44725	0.38925	0.3335	0.28775	0.2535	0.2265	0.20525	0.18825	0.1795	0.17075	0.1685	0.16675	0.16875
													SD
Cu30-1	Default	2017-3-21	10:58	0	300	0.009	701	0.005	Measure	USB2G35041BF985	1.004101/-0.44/128/24	717	-0.008	-0.015	-0.011	0.001	0.008	0.008	0.008	0.006	0.005	0.009	0.008	0.009	0.008	0.009	0.008	0.008	0.008	0.008	0.008	0.008	0.009	0.009	0.01	0.01	0.009	0.009	0.009	0.01	0.009	0.008	0.008	0.006	0.007	0.007	0.008	0.007	0.008
Cu30-2	Default	2017-3-21	10:59	0	300	0.006	701	0.002	Measure	USB2G35041BF985	1.004101/-0.44/128/24	741	-0.007	-0.018	-0.006	-0.002	0.006	0.006	0.003	0.004	0.003	0.007	0.006	0.006	0.005	0.006	0.006	0.006	0.004	0.005	0.004	0.005	0.005	0.005	0.006	0.007	0.005	0.004	0.005	0.006	0.006	0.006	0.005	0.003	0.006	0.004	0.005	0.005	0.005
Cu30-1	Default	2017-3-21	10:59	0	300	0.007	701	0.003	Measure	USB2G35041BF985	1.004101/-0.44/128/24	573	-0.007	-0.017	-0.017	-0.001	0.005	0.007	0.004	0.005	0.004	0.008	0.006	0.008	0.006	0.007	0.007	0.006	0.007	0.006	0.005	0.006	0.007	0.006	0.007	0.007	0.006	0.005	0.005	0.006	0.006	0.006	0.006	0.004	0.006	0.005	0.006	0.007	0.006
												Cu²⁺ (120 µM)	Average	-0.0166667	-0.0113333	-0.000666667	0.00633333	0.007	0.005	0.005	0.004	0.008	0.00666667	0.00766667	0.00633333	0.00733333	0.007	0.00666667	0.00633333	0.00633333	0.00566667	0.00633333	0.007	0.00666667	0.00766667	0.008	0.00666667	0.006	0.00633333	0.00733333	0.007	0.00666667	0.00633333	0.00433333	0.00633333	0.00533333	0.00633333	0.00633333	0.00633333
													SD
Cu60-3	Default	2017-3-21	10:55	0	300	0.008	701	0.003	Measure	USB2G35041BF985	1.004101/-0.44/128/24	717	-0.007	-0.004	-0.005	-0.001	0.009	0.009	0.008	0.009	0.006	0.01	0.009	0.01	0.01	0.009	0.009	0.009	0.009	0.009	0.007	0.007	0.008	0.007	0.008	0.008	0.007	0.007	0.007	0.008	0.007	0.008	0.008	0.006	0.007	0.007	0.007	0.008	0.008
Cu60-2	Default	2017-3-21	10:56	0	300	0.005	701	0.003	Measure	USB2G35041BF985	1.004101/-0.44/128/24	691	-0.008	-0.02	-0.013	-0.003	0.005	0.005	0.004	0.003	0.002	0.004	0.004	0.004	0.004	0.005	0.005	0.005	0.005	0.005	0.004	0.004	0.005	0.004	0.005	0.005	0.004	0.004	0.004	0.005	0.005	0.004	0.004	0.003	0.004	0.005	0.007	0.005	0.004
Cu60-1	Default	2017-3-21	10:57	0	300	0.008	701	0.003	Measure	USB2G35041BF985	1.004101/-0.44/128/24	719	-0.007	-0.023	-0.011	-0.01	0.003	0.007	0.006	0.007	0.004	0.006	0.006	0.009	0.008	0.008	0.007	0.006	0.007	0.007	0.006	0.007	0.007	0.006	0.007	0.008	0.008	0.008	0.007	0.008	0.008	0.006	0.006	0.005	0.006	0.007	0.009	0.007	0.007
												Cu²⁺ (60 µM)	Average	-0.0156667	-0.00966667	-0.00466667	0.00566667	0.007	0.006	0.00633333	0.004	0.00666667	0.00633333	0.00766667	0.00733333	0.00733333	0.007	0.00666667	0.007	0.007	0.00566667	0.006	0.00666667	0.00566667	0.00666667	0.007	0.00633333	0.00633333	0.006	0.007	0.00666667	0.006	0.006	0.00466667	0.00566667	0.00633333	0.00766667	0.00666667	0.00633333
													SD
Cu120-1	Default	2017-3-21	10:53	0	300	0.006	701	0.003	Measure	USB2G35041BF985	1.004101/-0.44/128/24	573	-0.007	0.02	0.019	0.03	0.037	0.04	0.036	0.033	0.027	0.028	0.027	0.026	0.024	0.022	0.021	0.02	0.018	0.019	0.016	0.016	0.015	0.013	0.013	0.012	0.011	0.007	0.007	0.008	0.006	0.005	0.004	0.003	0.005	0.004	0.004	0.004	0.003
Cu120-2	Default	2017-3-21	10:54	0	300	0.008	701	0.003	Measure	USB2G35041BF985	1.004101/-0.44/128/24	740	-0.008	-0.023	-0.009	0.003	0.009	0.01	0.011	0.007	0.007	0.012	0.011	0.012	0.01	0.009	0.01	0.011	0.01	0.01	0.008	0.009	0.009	0.008	0.009	0.009	0.007	0.008	0.009	0.01	0.008	0.008	0.007	0.006	0.007	0.007	0.008	0.006	0.008
Cu120-3	Default	2017-3-21	10:55	0	300	0.007	701	0.003	Measure	USB2G35041BF985	1.004101/-0.44/128/24	717	-0.007	-0.028	-0.004	0.001	0.007	0.01	0.007	0.006	0.008	0.009	0.009	0.009	0.009	0.009	0.008	0.008	0.008	0.009	0.006	0.007	0.007	0.007	0.008	0.007	0.007	0.006	0.007	0.007	0.007	0.007	0.006	0.005	0.006	0.006	0.007	0.006	0.006
												Cu²⁺ (30 µM)	Average	-0.0103333	0.002	0.0113333	0.0176667	0.02	0.018	0.0153333	0.014	0.0163333	0.0156667	0.0156667	0.0143333	0.0133333	0.013	0.013	0.012	0.0126667	0.01	0.0106667	0.0103333	0.00933333	0.01	0.00933333	0.00833333	0.007	0.00766667	0.00833333	0.007	0.00666667	0.00566667	0.00466667	0.006	0.00566667	0.00633333	0.00533333	0.00566667
													SD
	Hb
	0.6288
	0.798
	0.764
	0.8682
	0.7814
	0.5324
	0.3872
	0.283
	0.2352
	0.202
	0.1928															Cu2+
	0.1892
	0.1932
	0.2006
	0.207
	0.2154
	0.2238
	0.2266
	0.2282
	0.226
	0.2202
	0.214
	0.1992
	0.1814
	0.166
	0.144
	0.1272
	0.1148
	0.1074
	0.1034
	0.1058
	0.1114
	0.1174
	0.1256
	0.1342
	0.143
	0.1502
	0.1578
	0.1636
	0.1692
	0.173
	0.1756
	0.1772
	0.1758
	0.1726
	0.1664
	0.162
	0.1558
	0.1518
	0.1474
	0.1476
	0.1496
	0.1564
	0.1696
	0.187
	0.2116
	0.2428
	0.2868
	0.3308
	0.3824
	0.4472
	0.534
	0.6168
	0.6984
	0.7734
	0.7942
	0.7658
	0.6804
	0.5792
	0.475
	0.366
	0.2924
	0.234
	0.1936
	0.1642
	0.1376
	0.118
	0.103
	0.0918
	0.081
	0.0724
	0.0674
	0.0622
	0.0578
	0.0536
	0.0494
	0.047
	0.0456
	0.0398
	0.0374
	0.0368
	0.0376
	0.0388
	0.0356
	0.0358
	0.0352
	0.0336
	0.0358
	0.0354
	0.0376
	0.042
	0.0472
	0.0558
	0.0662
	0.0726
	0.0824
	0.0926
	0.0934
	0.0926
	0.088
	0.0784
	0.0694
	0.0592
	0.0568
	0.0574
	0.061
	0.0688
	0.0798
	0.0896
	0.0982
	0.0904
	0.0712
	0.0478
	0.032
	0.0222
	0.0146
	0.0092
	0.0098
	0.0108
	0.007
	0.0032
	0.0034
	0.0038
	0.006
	0.0088
	0.0078
	0.0042
	0.0066
	0.0052
	0.0042
	0.0066
	0.0062
	0.0024
	-0.001
	0.0004
	0.0026
	0.0024
	0.002
	0.0046
	0.0046
	0.0048
	0.0032
	0.0004
	0.0048
	0.0052
	0.0046
	0.0024
	0.0012
	0.0018
	0.0024
	0.003
	0.001
	0.0008
	0.0022
	0.0014
	0.0028
	0.0022
	0.0022
	0.0004
	0.003
	0.004
	0.005
	0.0048
	0.0036
	0.0032
	0.0052
	0.004
[truncated: 141 more columns]
